# Supplementary material
Source: publisher site journal article supplement (https://www.spandidos-publications.com/4443/downloadSupplementary)
Supplement: Supplementary file 2 [file downloadSupplementary]

## Sheet: IPA.Diseases&Functions
Table SIX. The results of IPA's disease & function analysis of these differentially expressed chromosome 3p genes
Category	p-value	Molecules
Digestive System Development and Function	2.64E-07-8.52E-03	CADPS,CCR1,CISH,FANCD2,GNAI2,GPX1,PPARG,PRKCD,VIPR1
Endocrine System Disorders	2.64E-07-9.93E-03	ADAMTS9,ALS2CL,ARHGEF3,ATXN7,CACNA2D2,CADPS,CCR1,CCRL2,CISH,CLEC3B,CMTM8,FANCD2,FGD5,FRMD4B,FYCO1,GNAI2,GPD1L,GPX1,GRM2,PLCD1,PPARG,PPM1M,PRICKLE2,PRKCD,PTPRG,RBMS3,RFTN1,SH3BP5,VGLL3,VIPR1
Gastrointestinal Disease	2.64E-07-9.93E-03	ADAMTS9,ALS2CL,ARHGEF3,ATXN7,C3orf14,CACNA2D2,CADPS,CCR1,CCRL2,CDC25A,CISH,CLEC3B,FAM107A,FANCD2,FGD5,FRMD4B,FYCO1,GNAI2,GPD1L,GPX1,GRM2,PLCD1,PPARG,PPM1M,PRICKLE2,PRKCD,PTPRG,RFTN1,SH3BP5,VGLL3,VIPR1
Organ Morphology	2.64E-07-9.1E-03	ADAMTS9,ATXN7,CACNA2D2,CADPS,CISH,GNAI2,GPD1L,GPX1,PLCD1,PPARG,PRKCD,VIPR1
Organismal Development	2.64E-07-9.93E-03	ADAMTS9,ATXN7,CACNA2D2,CADPS,CCR1,CDC25A,CISH,FANCD2,GNAI2,GPD1L,GPX1,PLCD1,PPARG,PRKCD,RFTN1,VIPR1
Organismal Injury and Abnormalities	2.64E-07-9.93E-03	ADAMTS9,ALS2CL,ARHGEF3,ATXN7,C3orf14,CACNA2D2,CADPS,CCR1,CCRL2,CDC25A,CISH,CLEC3B,CMTM8,FAM107A,FANCD2,FGD5,FRMD4B,FYCO1,GNAI2,GPD1L,GPX1,GRM2,PLCD1,PPARG,PPM1M,PRICKLE2,PRKCD,PTPRG,RBMS3,RFTN1,SH3BP5,VGLL3,VIPR1
Cell Morphology	3.46E-06-8.52E-03	CADPS,GPX1,GRM2,PLCD1,PPARG,PRKCD
Carbohydrate Metabolism	8.72E-06-8.1E-03	CADPS,CCR1,GRM2,PLCD1,PPARG,VIPR1
Lipid Metabolism	8.72E-06-7.92E-03	CCR1,CISH,GNAI2,GPX1,GRM2,PLCD1,PPARG,PRKCD,SH3BP5,VIPR1
Small Molecule Biochemistry	8.72E-06-9.93E-03	CADPS,CCR1,CISH,GNAI2,GPD1L,GPX1,GRM2,PLCD1,PPARG,PRKCD,SH3BP5,VIPR1
Infectious Diseases	1.67E-05-8.52E-03	CACNA2D2,CCR1,CCRL2,CISH,CLEC3B,FRMD4B,GNAI2,GPX1,GRM2,PPARG,PPM1M,PRKCD
Cancer	1.9E-05-9.93E-03	ADAMTS9,ALS2CL,ARHGEF3,ATXN7,C3orf14,CACNA2D2,CADPS,CCR1,CCRL2,CDC25A,CISH,CLEC3B,CMTM8,FAM107A,FANCD2,FGD5,FRMD4B,FYCO1,GNAI2,GPD1L,GPX1,GRM2,PLCD1,PPARG,PPM1M,PRICKLE2,PRKCD,PTPRG,RBMS3,RFTN1,SH3BP5,VGLL3,VIPR1
Dermatological Diseases and Conditions	1.9E-05-9.93E-03	ADAMTS9,ALS2CL,ARHGEF3,ATXN7,CACNA2D2,CADPS,CCR1,CCRL2,CDC25A,CISH,CLEC3B,CMTM8,FAM107A,FANCD2,FGD5,FRMD4B,FYCO1,GNAI2,GPD1L,GPX1,GRM2,PLCD1,PPARG,PRICKLE2,PRKCD,PTPRG,RBMS3,RFTN1,SH3BP5,VGLL3
Cell Signaling	3.05E-05-9.93E-03	CACNA2D2,CCR1,CISH,GNAI2,GRM2,PLCD1,PPARG,PRKCD,RFTN1,SH3BP5,VIPR1
Molecular Transport	3.05E-05-7.92E-03	ATXN7,CACNA2D2,CADPS,CCR1,CISH,FANCD2,GNAI2,GPD1L,GPX1,GRM2,PLCD1,PPARG,PRKCD,RFTN1,SH3BP5
Vitamin and Mineral Metabolism	3.05E-05-7.83E-03	CACNA2D2,CCR1,GNAI2,GRM2,PLCD1,PPARG,PRKCD,RFTN1,SH3BP5
Cell Cycle	3.35E-05-8.52E-03	CDC25A,FANCD2,GNAI2,GPX1,PPARG,PRKCD
Humoral Immune Response	4.4E-05-9.93E-03	CCR1,GNAI2,PPARG,PRKCD,RFTN1
Protein Synthesis	4.4E-05-7.29E-03	CCR1,GNAI2,PLCD1,PPARG,PRKCD,RFTN1
Cell Death and Survival	4.64E-05-9.93E-03	ARHGEF3,ATXN7,CACNA2D2,CADPS,CCR1,CDC25A,CISH,FANCD2,GNAI2,GPX1,GRM2,PPARG,PPM1M,PRKCD,PTPRG,SH3BP5
Metabolic Disease	8.49E-05-9.93E-03	ADAMTS9,ATXN7,CACNA2D2,CCR1,CCRL2,CISH,CLEC3B,FANCD2,FRMD4B,FYCO1,GNAI2,GPX1,PLCD1,PPARG,PRICKLE2,PRKCD,PTPRG,VIPR1
Gene Expression	8.96E-05-2.85E-03	GPX1,PPARG,PRKCD
Hereditary Disorder	1.29E-04-9.93E-03	ATXN7,CACNA2D2,CCR1,CISH,CLEC3B,FANCD2,FRMD4B,FYCO1,GNAI2,GPD1L,GPX1,PLCD1,PPARG,PRICKLE2,PRKCD
Neurological Disease	1.29E-04-9.93E-03	ADAMTS9,ATXN7,CACNA2D2,CADPS,CCR1,CCRL2,CDC25A,CISH,CLEC3B,CMTM8,FAM107A,FANCD2,FGD5,FRMD4B,GNAI2,GPX1,GRM2,PLCD1,PPARG,PRICKLE2,PRKCD,PTPRG,RFTN1,VIPR1
Cardiovascular Disease	1.52E-04-9.93E-03	ADAMTS9,CACNA2D2,FANCD2,FRMD4B,GNAI2,GPD1L,GPX1,PPARG,PRKCD,SH3BP5
DNA Replication, Recombination, and Repair	1.52E-04-8.53E-03	CDC25A,FANCD2,GNAI2,PPARG,PRKCD
Embryonic Development	1.52E-04-6.38E-03	ADAMTS9,ATXN7,CDC25A,CISH,PPARG,PRKCD,PTPRG,RFTN1
Psychological Disorders	2.05E-04-9.8E-03	CACNA2D2,CLEC3B,CMTM8,FRMD4B,GRM2,PLCD1,PPARG,PRICKLE2,PRKCD,PTPRG
Developmental Disorder	2.15E-04-9.93E-03	ADAMTS9,CACNA2D2,CCR1,CDC25A,CLEC3B,FANCD2,FRMD4B,FYCO1,GNAI2,GPX1,PLCD1,PPARG,PRICKLE2,PRKCD,VIPR1
Hematological Disease	2.32E-04-9.93E-03	ADAMTS9,ARHGEF3,ATXN7,CACNA2D2,CADPS,CCR1,CISH,FANCD2,FRMD4B,GNAI2,GPX1,PLCD1,PPARG,PRICKLE2,PRKCD,PTPRG,RFTN1,VIPR1
Immunological Disease	2.32E-04-9.93E-03	ADAMTS9,ARHGEF3,ATXN7,CADPS,CCR1,CCRL2,CDC25A,CISH,FANCD2,FRMD4B,GNAI2,PLCD1,PPARG,PRICKLE2,PRKCD,PTPRG,RFTN1
Skeletal and Muscular Disorders	2.33E-04-9.93E-03	ADAMTS9,CACNA2D2,CCR1,CCRL2,CISH,CLEC3B,FANCD2,GNAI2,GPD1L,GPX1,PLCD1,PPARG,PRICKLE2,PRKCD,SH3BP5,VIPR1
Cellular Movement	2.4E-04-9.93E-03	CCR1,CCRL2,CMTM8,GNAI2,PLCD1,PPARG,PRKCD,VIPR1
Cell-To-Cell Signaling and Interaction	2.57E-04-9.93E-03	ARHGEF3,CADPS,CCR1,CCRL2,CISH,FAM107A,GNAI2,GPX1,GRM2,PLCD1,PPARG,PRKCD,SH3BP5,VIPR1
Cardiovascular System Development and Function	2.97E-04-7.7E-03	ADAMTS9,CACNA2D2,GNAI2,GPD1L,GPX1,PLCD1,PPARG,PRKCD
Reproductive System Development and Function	2.97E-04-8.52E-03	CDC25A,CISH,PLCD1,PPARG
Inflammatory Response	3.54E-04-9.93E-03	ADAMTS9,CACNA2D2,CCR1,CCRL2,CDC25A,CISH,FANCD2,FRMD4B,GNAI2,GPX1,PPARG,PRKCD,RFTN1,VIPR1
Cellular Function and Maintenance	4.05E-04-9.8E-03	ARHGEF3,CADPS,CCR1,CCRL2,CISH,FAM107A,GNAI2,GPX1,GRM2,PPARG,PRKCD,RFTN1,VIPR1
Cell-mediated Immune Response	4.11E-04-4.11E-04	CISH,PPARG,RFTN1
Cellular Development	4.11E-04-8.52E-03	CDC25A,CISH,CMTM8,FANCD2,GPX1,PPARG,PRKCD,PTPRG,RFTN1,VGLL3
Cellular Growth and Proliferation	4.11E-04-8.52E-03	CCR1,CISH,GPX1,PPARG,PRKCD,PTPRG,RFTN1,VGLL3
Hematological System Development and Function	4.11E-04-9.93E-03	CCR1,CCRL2,CISH,FANCD2,GNAI2,PLCD1,PPARG,PRKCD,RFTN1,VIPR1
Hematopoiesis	4.11E-04-5.69E-03	CISH,FANCD2,GNAI2,PPARG,RFTN1
Lymphoid Tissue Structure and Development	4.11E-04-9.1E-03	CCR1,CISH,GNAI2,PLCD1,PPARG,PRKCD,RFTN1
Organ Development	4.11E-04-7.44E-03	ATXN7,CACNA2D2,CDC25A,CISH,GNAI2,GPX1,PPARG,RFTN1
Tissue Development	4.11E-04-7.44E-03	ARHGEF3,ATXN7,CCR1,CDC25A,CISH,CLEC3B,FAM107A,GNAI2,GPX1,PPARG,PRKCD,RFTN1
Connective Tissue Disorders	4.23E-04-9.3E-03	ADAMTS9,CACNA2D2,CCR1,CCRL2,CISH,CLEC3B,GNAI2,PPARG,VIPR1
Inflammatory Disease	4.23E-04-9.93E-03	ADAMTS9,CACNA2D2,CCR1,CCRL2,CISH,FRMD4B,GNAI2,GPX1,PPARG,VIPR1
Free Radical Scavenging	4.72E-04-7.36E-03	FANCD2,GPX1,PPARG,PRKCD,SH3BP5
Tissue Morphology	5.6E-04-9.1E-03	ADAMTS9,ATXN7,CACNA2D2,CCR1,CDC25A,CISH,FANCD2,GNAI2,GPX1,PLCD1,PPARG,PRKCD,RFTN1,SH3BP5
Respiratory Disease	6.49E-04-4.27E-03	CACNA2D2,CCR1,CISH,FANCD2,FRMD4B,GNAI2,GPX1,PPARG
Nervous System Development and Function	7.39E-04-8.52E-03	ATXN7,CACNA2D2,CCR1,GNAI2,GPX1,GRM2,PPARG,PRKCD,PTPRG
Connective Tissue Development and Function	7.8E-04-8.52E-03	CDC25A,CLEC3B,FANCD2,PPARG,PRKCD
Immune Cell Trafficking	7.96E-04-9.93E-03	CCR1,CCRL2,GNAI2,PPARG,PRKCD,VIPR1
Drug Metabolism	8.33E-04-7.1E-03	CADPS,GPX1,GRM2,PPARG,PRKCD
Cellular Compromise	1.07E-03-9.93E-03	ATXN7,CACNA2D2,FAM107A,GNAI2,GPX1,PPARG,PRKCD,SH3BP5
Reproductive System Disease	1.14E-03-9.93E-03	ADAMTS9,ARHGEF3,CACNA2D2,CADPS,CDC25A,CLEC3B,CMTM8,FAM107A,FANCD2,FGD5,FRMD4B,GNAI2,GRM2,PPARG,PRICKLE2,PRKCD,PTPRG
Hypersensitivity Response	1.31E-03-4.6E-03	CCR1,CISH,GNAI2,PPARG
Cellular Assembly and Organization	1.42E-03-9.93E-03	ARHGEF3,CADPS,FAM107A,GNAI2,GPX1,PLCD1,PPARG,PRKCD
Hair and Skin Development and Function	1.42E-03-8.52E-03	ADAMTS9,CDC25A,PLCD1,PPARG,PRKCD
Nutritional Disease	1.42E-03-7.1E-03	PPARG
Ophthalmic Disease	1.42E-03-9.93E-03	ATXN7,FYCO1,PRICKLE2
Organismal Functions	1.42E-03-2.85E-03	PPARG
Skeletal and Muscular System Development and Function	1.42E-03-8.52E-03	CLEC3B,GNAI2,GPX1,PPARG,PRKCD
Tumor Morphology	1.42E-03-5.69E-03	PPARG,PRKCD
Visual System Development and Function	1.42E-03-1.42E-03	ATXN7
Renal and Urological Disease	1.96E-03-4.6E-03	CACNA2D2,CCR1,PPARG,PRKCD
Nucleic Acid Metabolism	2.09E-03-9.93E-03	CCR1,GNAI2,GPD1L,GPX1,GRM2,PRKCD,VIPR1
Organismal Survival	2.25E-03-7.3E-03	ADAMTS9,CACNA2D2,CADPS,CCR1,CDC25A,FANCD2,GNAI2,GPD1L,GPX1,PLCD1,PPARG,PRKCD,VIPR1
Endocrine System Development and Function	2.41E-03-7.1E-03	CADPS,GPX1,PPARG,PRKCD,VIPR1
Hepatic System Disease	2.85E-03-9.93E-03	FANCD2,PPARG
Behavior	4.27E-03-4.27E-03	GRM2
Hepatic System Development and Function	5.69E-03-5.69E-03	PPARG
Cellular Response to Therapeutics	7.1E-03-7.1E-03	PPARG
Renal and Urological System Development and Function	7.1E-03-7.1E-03	CDC25A
